# Supplementary material
Source: publisher site journal article supplement (https://www.dovepress.com/article/304492)

**Supplementary data**

**Figure1.** NLRP3 overexpression or MF treatment had no effects on the levels of ASC and caspase1. (n = 5, *P＜0.05 vs. indicated group; NS, no significance).


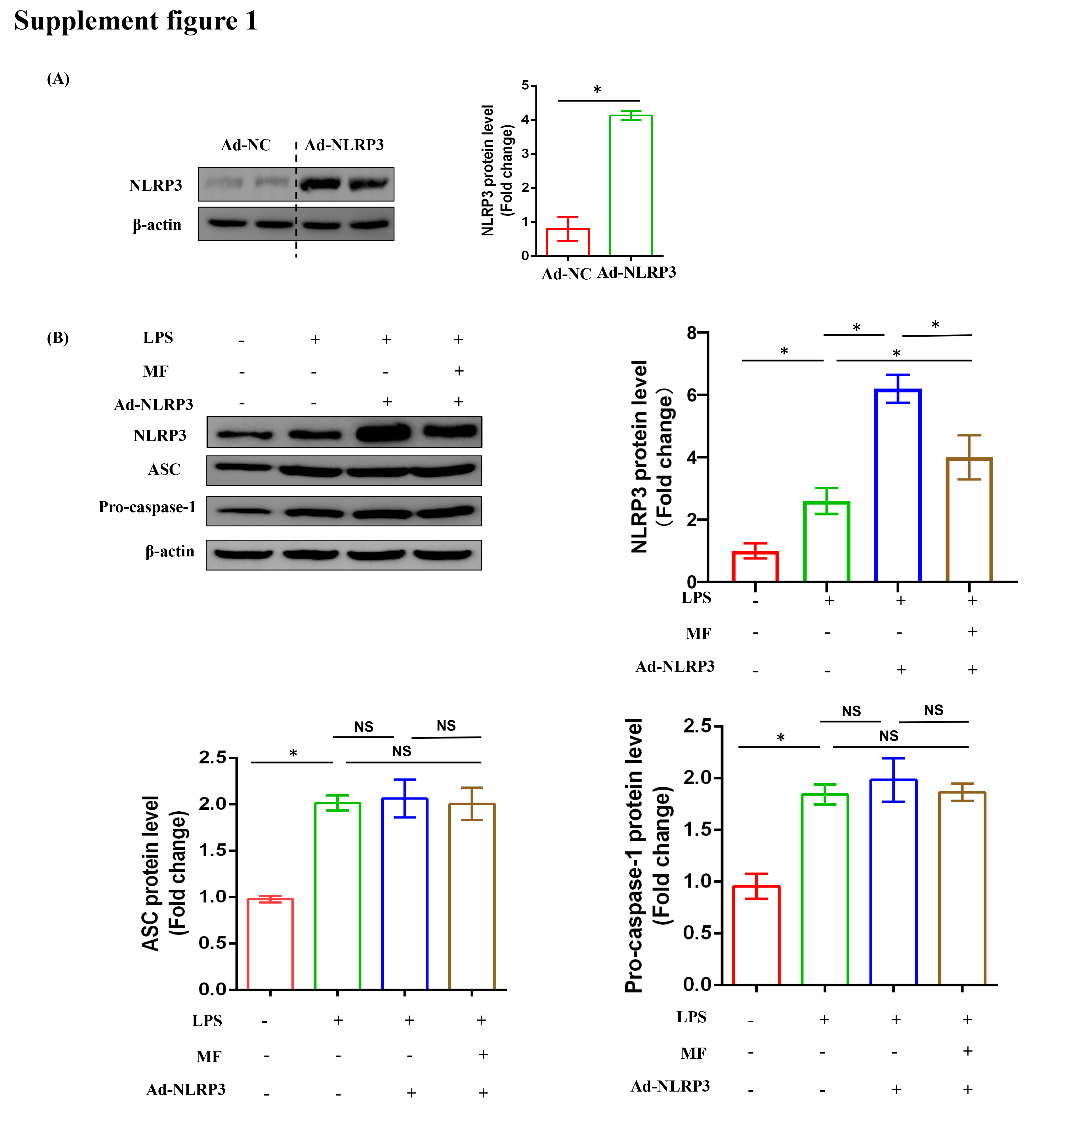


**Figure2.** 4-week MF intervention displayed no organic toxicity. A. H&E staining of murine kidney, liver and heart tissues. B-D. The levels of creatinine, ALT and CK-MB in serum. (n = 5, *P＜0.05 vs. Control group; NS, no significance).


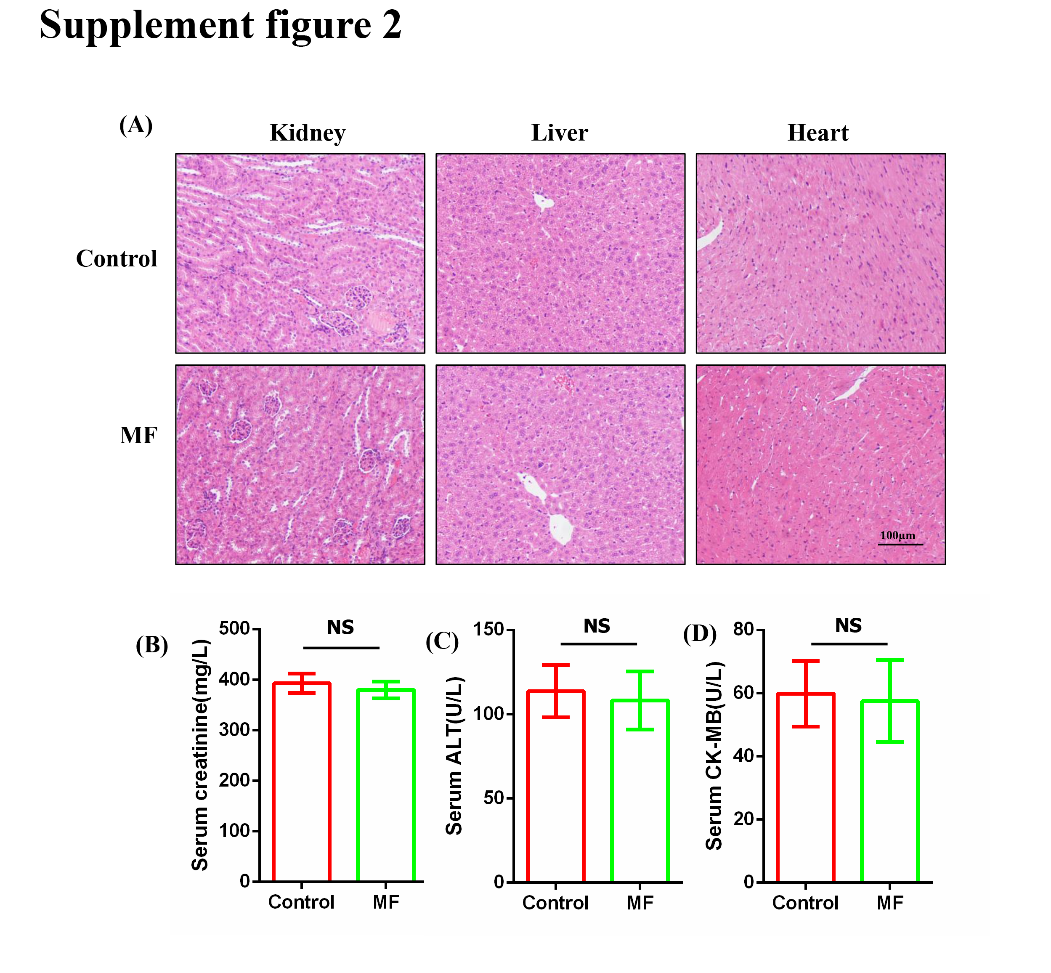

Supplement: Supplementary file 1 [file get_supplementary_file.php]
